# Supplementary material for: The cys-loop ligand-gated ion channel gene superfamily of the red flour beetle, Tribolium castaneum
Source: PubMed Central journal article supplement (PMC2064938; doi:10.1186/1471-2164-8-327), 2007-09-19
Supplement: 1471-2164-8-327-S1.pdf [file 1471-2164-8-327-S1.pdf]

**Supplemental Material Table S1.** Sequences of primers used to amplify open reading frames of *T. castaneum* cys-loop LGIC subunits. Forward primers are on the top of each pair and reverse primers are on the bottom.

| Subunit          | 1 <sup>st</sup> PCR reaction                   | 2 <sup>nd</sup> PCR reaction                    |
|------------------|------------------------------------------------|-------------------------------------------------|
| Tcas $\alpha$ 1  | atggagctggtgctcgcc +<br>ttacaactcctccggtac     | cctttcatggttgatthttg +<br>tcaacaacgccatthttcttc |
| Tcas $\alpha$ 2  | atgatgtggtggtggctg +<br>ttagaaatctaattcaggtaga | ttcggactgtthttgtcgg +<br>gttggtgggctactgacg     |
| Tcas $\alpha$ 3  | atgaagacttggtgggg +<br>taaagaactggcaatatggg    | tgtggatagthtttagtgctc +<br>gcagtggctgatgcaatc   |
| Tcas $\alpha$ 4  | atgcctccttctgccc +<br>ctactgtggaggaggc         | gagacgctgagagcctg +<br>gaacaaccgtagtgggtg       |
| Tcas $\alpha$ 5  | ttgatagttgtaatcctggtg +<br>agaggccgctgctgtt    | gagaatgtcaaggggacg +<br>gacttctgcataaatcctg     |
| Tcas $\alpha$ 6  | atggtccggagcgagca +<br>ctactgcacgattatgtgc     | tggcgctgctggccac +<br>gtggcgatgatcgtgaac        |
| Tcas $\alpha$ 7  | atggacagtggcatgcag +<br>acgatacgatgatgtgagg    | tgtcaattctactgcggctc +<br>ccgagaacagcactgcta    |
| Tcas $\alpha$ 8  | tttaataaaattagthttgttcac +<br>gtgggatgtgtgtg   | catgctgtthaaatccactg +<br>ttcgtgagaggaatthtcg   |
| Tcas $\alpha$ 9  | atgggcattctaaattatthtc +<br>taaggggtgaaccgataa | cctttcagctgctgctt +<br>aacaatcacgtagacgagg      |
| Tcas $\alpha$ 10 | atggcaaacatactgaggc +<br>tcacacggaataaaactatgg | tgggtgtgctgctthttgca +<br>aaagtgatccgatctatggc  |
| Tcas $\alpha$ 11 | tgtacttgthaaagthttacatg +<br>tacaacctcaaagcggc | gtthaaagthttgtgtggtg +<br>atctactggaatcctcgtg   |
| Tcas $\beta$ 1   | atgtggacctggaccgc +<br>tatttgccgctgtaaatthtc   | acagcggctctcatctcg +<br>attcgaagatgtgaggagc     |
| Tcas_RDL         | gggtggtgtggccagc +<br>acttatcctcctccagaag      | gtgctgctggccctcg +<br>tagatcgtccgctacaaca       |
| Tcas_GRD         | gaagcgtthtcaactthtg +<br>tctctggctcctcgacag    | gaccgthtctgctgctaac +<br>tactctagaagctcgatcaa   |
| Tcas_LCCH3       | atgatcacgattatctacatc +<br>aacagccagtaccagca   | cattthcattgaggatattc +<br>agtaaccgggaaataatcc   |
| Tcas_GluCl       | gtatacacacacctcatc +<br>ttacgactcttggcctc      | gatagtgcacatcatccac +<br>tatattacattgaagagtgcg  |
| Tcas_HisCl1      | gcctccgthttctgthtagg +<br>tactcagcgaacattatcca | tgggtggttccgattacc +<br>aggacagtgaagagcaaag     |
| Tcas_HisCl2      | gtattctgtgthttactggc +<br>aacgtcgtccagtacacaa  | ctgtgtatgatctcaaatgta +<br>actggtcaatacagagagc  |

|            |                                               |                                                |
|------------|-----------------------------------------------|------------------------------------------------|
| Tcas_pHCl  | atgggtcagccttggatg +<br>ttgtgagtcagagtgagtg   | ggctgctatacttctagtg +<br>aactgctgtagtgatagaag  |
| Tcas_8916  | ttcgggccggtttttgtc +<br>cagtgactaagcgagctc    | ttgttcggaagctttgagg +<br>cttcgtatccgcccattta   |
| Tcas_12344 | tgtgggttgtggtgacag +<br>acaacaatgtcgacttcta   | aagtacgacctcctactca +<br>gtccagtaaatacgacacaga |
| Tcas_6927  | atgcagaaactcgttctc +<br>acaacatagacgaaagacca  | atgtgcacaagggcccag +<br>tccagttggcgacctcg      |
| Tcas_7589  | tgctaaagtggcggcttg +<br>gcgggaacacgattcttg    | ttgcctcgtttatgactgg +<br>tttctgtcgatccagttg    |
| Tcas_11340 | gactagtgcagttctagtc +<br>tatacaaacacccagtagag | agtgattgaaggagaagcc +<br>tgagtgggaagacaattcg   |

---
