# Supplementary material for: The cys-loop ligand-gated ion channel gene superfamily of the red flour beetle, Tribolium castaneum
Source: PubMed Central journal article supplement (PMC2064938; doi:10.1186/1471-2164-8-327), 2007-09-19
Supplement: 1471-2164-8-327-S3.pdf [file 1471-2164-8-327-S3.pdf]

**Additional file 3.** Sequences of primers used to amplify alternate splice variants of *T. castaneum* cys-loop LGIC subunits. Forward primers are on the top of each pair and reverse primers are on the bottom. All primers are shown 5' to 3'.

| Subunit Variant         | 1 <sup>st</sup> PCR reaction              | 2 <sup>nd</sup> PCR reaction                    |
|-------------------------|-------------------------------------------|-------------------------------------------------|
| Tcas $\alpha$ 6<br>3a8a | tggcgctgctggccac +<br>gcagttgaaataggtccc  | gaaaagaatcagattctcacg +<br>gaactgcatcggacgtgg   |
| Tcas $\alpha$ 6<br>3a8b | tggcgctgctggccac +<br>gcagttgaaataggtccc  | gaaaagaatcagattctcacg +<br>aaggaatggcgctcagatac |
| Tcas $\alpha$ 6<br>3a8c | tggcgctgctggccac +<br>gcagttgaaataggtccc  | gaaaagaatcagattctcacg +<br>gacgtctgggttatcacg   |
| Tcas $\alpha$ 6<br>3b8a | tggcgctgctggccac +<br>gcagttgaaataggtccc  | ggacgagaagaatcaactc +<br>gaactgcatcggacgtgg     |
| Tcas $\alpha$ 6<br>3b8b | tggcgctgctggccac +<br>gcagttgaaataggtccc  | ggacgagaagaatcaactc +<br>aaggaatggcgctcagatac   |
| Tcas $\alpha$ 6<br>3b8c | tggcgctgctggccac +<br>gcagttgaaataggtccc  | ggacgagaagaatcaactc +<br>gacgtctgggttatcacg     |
| Tcas_RDL<br>3a6a        | gtgctgctggccctcg +<br>tcccaaatagacgtcgatc | ctcagtatcagctccgtc +<br>ggtcagggttaattacggtc    |
| Tcas_RDL<br>3a6b        | gtgctgctggccctcg +<br>tcccaaatagacgtcgatc | ctcagtatcagctccgtc +<br>gtgaggctgatctccatg      |
| Tcas_RDL<br>3b6a        | gtgctgctggccctcg +<br>tcccaaatagacgtcgatc | ctcgctgtccgaagtgaa +<br>ggtcagggttaattacggtc    |
| Tcas_RDL<br>3b6b        | gtgctgctggccctcg +<br>tcccaaatagacgtcgatc | ctcgctgtccgaagtgaa +<br>gtgaggctgatctccatg      |
| Tcas_RDL<br>3c6a        | gtgctgctggccctcg +<br>tcccaaatagacgtcgatc | tcgctgtccgaggtcca +<br>ggtcagggttaattacggtc     |
| Tcas_RDL<br>3c6b        | gtgctgctggccctcg +<br>tcccaaatagacgtcgatc | tcgctgtccgaggtcca +<br>gtgaggctgatctccatg       |
