# Supplementary material for: The cys-loop ligand-gated ion channel gene superfamily of the red flour beetle, Tribolium castaneum
Source: PubMed Central journal article supplement (PMC2064938; doi:10.1186/1471-2164-8-327), 2007-09-19
Supplement: 1471-2164-8-327-S4.pdf [file 1471-2164-8-327-S4.pdf]

**Additional file 4.** Sequences of primers recognising intron DNA of *T. castaneum* cys-loop LGIC subunit genes. Forward primers are on the top of each pair and reverse primers are on the bottom. All primers are shown 5' to 3'.

| Subunit         | 1 <sup>st</sup> PCR reaction                | 2 <sup>nd</sup> PCR reaction                |
|-----------------|---------------------------------------------|---------------------------------------------|
| Tcas $\alpha$ 6 | tctatcggctctggtgacg +<br>tgcagtgtgggaagtgtg | tggtctcacggctctctga +<br>gcgtgtgatgtggtagca |
| Tcas $\beta$ 1  | ttcgagacctcttccgag +<br>gttcctttttgccaaatgg | gtacaacaagctgatacgc +<br>gggtaacctgagtacagc |
